# Supplementary material
Source: Research Square preprint supplement (doi:10.21203/rs.3.rs-9761885/v1)
Supplement: Supplementary file 1 [file 5d9ead690c709c1076aadcce.pdf]

Supplementary Information document associated with preprint

# **AlloyBot: On-Demand Synthesis of Bulk Alloys by Automatic Arc-Melting**

Vignesh Selvaraj <sup>a</sup>, Pakorn Boonpetch <sup>a</sup>, Anagh Dutta <sup>a</sup>, Ming En Pek <sup>a</sup>,  
Sebastian A. Kube <sup>a,\*</sup>

<sup>a</sup> Department of Materials Science and Engineering, University of Wisconsin-Madison,  
Madison, WI 53706, USA

\* Corresponding author. E-mail address: [sebastian.kube@wisc.edu](mailto:sebastian.kube@wisc.edu)

## Supplementary Video Files

Supplementary video files are enclosed to illustrate the operation of the automatic synthesis system presented here:

- **Video01\_Weighing\_Clip01\_PlaceCupOnScale.mp4:** The robot drives up to the weighing module and places a clean copper crucible into the stacking position. The robot picks up a weighing cup and places it on the scale.
- **Video02\_Weighing\_Clip02\_DispersePelletsIntoCup.mp4:** Pellets dropping from the funnel into the weighing cup on the scale and increasing the mass on the scale display. Inside view of a pellet dispenser, showing how the rotating disk mechanism singulates the copper pellet feedstock. (Wire dispensing not included here because difficult to show in video.) Once target mass is reached, the robot moves in to pick the cup from the scale.
- **Video03\_Weighing\_Clip03\_WeighingAndStacking.mp4:** Accelerated view illustrating how the robot sequentially weighs out four different elements. Next, a demonstration how the robot stacks the copper pellets into the crucible by carefully tilting and pouring from the weighing cup. Finally, the robot picks up the copper crucible and drives over to the arc melter, where the load-lock chamber door opens.
- **Video04\_Melting\_Clip01\_CrucibleLoadingSequence.mp4:** Robot places the crucible inside the load-lock, the robot retracts, the load-lock closes. Inside the load-lock chamber, the transfer mechanism picks up the crucible, drives it through the open gate valve into the melting chamber, and inserts it vertically into the hearth cavity. The transfer mechanisms retracts, and the arc electrodes drive into the melting position.
- **Video05\_Melting\_Clip02\_MeltingSequence.mp4:** Top-view of the melting electrodes positioned over the crucible and feedstock. The arcs are activated, and the heat generated begins to melt the feedstock. The melt draws in the solid feedstock, which naturally mixes and merges until a single liquid droplet has formed. (The droplet is initially slightly off-center here, and then becomes more centered due to the concave crucible floor.) The arcs are deactivated, the alloy cools and solidifies into a room temperature button.
- **Video06\_Melting\_Clip03\_ButtonFlipping.mp4:** After each (re)melting step, the electrodes retract, the transfer mechanism drives in, lowers the scoop, and progressively tilts the button up against the crucible sidewall, until it flips upside-down for the next remelting step.

**Table S1:** Cost of pure elemental feedstock, as used for the calculations presented in Fig.3.

| Element   | <u>Pellets:</u>    |                        | <u>Wire:</u>       |                        |
|-----------|--------------------|------------------------|--------------------|------------------------|
|           | Price / USD/5ccm   | Vendor                 | Price / USD/5ccm   | Vendor                 |
| <b>Al</b> | \$19               | Kurt J. Lesker         | Confidential Quote | Kurt J. Lesker         |
| <b>Ag</b> | \$299              | Kurt J. Lesker         | \$2,010            | Goodfellow             |
| <b>Au</b> | \$22,195           | Kurt J. Lesker         | \$17,971           | Kurt J. Lesker         |
| <b>Ce</b> | \$355              | Kurt J. Lesker         | \$355              | No availability found. |
| <b>Co</b> | \$266              | Kurt J. Lesker         | Confidential Quote | ESPI METALS            |
| <b>Cr</b> | \$13               | Kurt J. Lesker         | \$13               | No availability found. |
| <b>Cu</b> | \$49               | Kurt J. Lesker         | Confidential Quote | ESPI METALS            |
| <b>Fe</b> | \$56               | Kurt J. Lesker         | \$4,229            | Goodfellow             |
| <b>Ge</b> | \$451              | Kurt J. Lesker         | \$451              | No availability found. |
| <b>Hf</b> | Confidential Quote | Kurt J. Lesker         | \$7,796            | Goodfellow             |
| <b>La</b> | \$151              | Smart Elements         | \$151              | No availability found. |
| <b>Mg</b> | \$16               | Kurt J. Lesker         | \$9,444            | Goodfellow             |
| <b>Mn</b> | \$17               | Kurt J. Lesker         | \$17               | No availability found. |
| <b>Mo</b> | \$133              | Kurt J. Lesker         | \$720              | Goodfellow             |
| <b>Nb</b> | \$75               | Kurt J. Lesker         | Confidential Quote | Kurt J. Lesker         |
| <b>Ni</b> | \$79               | Kurt J. Lesker         | \$251              | Kurt J. Lesker         |
| <b>Pb</b> | \$89               | Kurt J. Lesker         | \$1,563            | Goodfellow             |
| <b>Pd</b> | \$5,069            | Kurt J. Lesker         | \$18,497           | Goodfellow             |
| <b>Pt</b> | \$12,255           | Kurt J. Lesker         | \$13,207           | Kurt J. Lesker         |
| <b>Ru</b> | Confidential Quote | Kurt J. Lesker         | Confidential Quote | No availability found. |
| <b>Si</b> | \$13               | Kurt J. Lesker         | \$13               | No availability found. |
| <b>Sn</b> | \$75               | Kurt J. Lesker         | \$3,822            | Goodfellow             |
| <b>Ta</b> | \$263              | Kurt J. Lesker         | \$1,771            | Goodfellow             |
| <b>Ti</b> | \$57               | Kurt J. Lesker         | \$669              | Kurt J. Lesker         |
| <b>V</b>  | \$173              | Kurt J. Lesker         | \$6,013            | Goodfellow             |
| <b>W</b>  | \$249              | Kurt J. Lesker         | \$784              | Goodfellow             |
| <b>Y</b>  | \$55               | Rare World Metals Mint | \$55               | No availability found. |
| <b>Zn</b> | \$29               | Kurt J. Lesker         | \$2,803            | Goodfellow             |
| <b>Zr</b> | \$67               | Kurt J. Lesker         | \$2,425            | Goodfellow             |

**Table S2.1: Lower bound impurity estimation based on certified feedstock values.**

**a)**

| <b>Ti-6Al-4V</b>                  | <b>Ti</b> | <b>Al</b> | <b>V</b> |                   |                     |
|-----------------------------------|-----------|-----------|----------|-------------------|---------------------|
| <b>Pellet Impurities</b>          |           |           |          |                   |                     |
| C / ppmw                          | 10        |           | 35       |                   |                     |
| O / ppmw                          | 240       |           | 150      |                   |                     |
| N / ppmw                          | 11        |           | 47       |                   |                     |
| <b>Wire Impurities</b>            |           |           |          |                   |                     |
| C / ppmw                          | 13        |           |          |                   |                     |
| O / ppmw                          | 214       |           |          |                   |                     |
| N / ppmw                          | 10        |           |          |                   |                     |
|                                   |           |           |          |                   |                     |
| <b>Weighed in Pellet Mass / g</b> | 10.089    | 0.739     | 0.437    |                   |                     |
| <b>Weighed in Wire Mass / g</b>   | 0.074     | 0.000     | 0.021    |                   |                     |
|                                   |           |           |          | <b>Total / ug</b> | <b>Total / ppmw</b> |
| <b>Weighed in C / ug</b>          | 102       | 0         | 15       | 117               | 10                  |
| <b>Weighed in O / ug</b>          | 2437      | 0         | 66       | 2503              | 220                 |
| <b>Weighed in N / ug</b>          | 112       | 0         | 21       | 132               | 12                  |

**b)**

| <b>Ti<sub>20</sub>Zr<sub>20</sub>Hf<sub>20</sub>Nb<sub>20</sub>Ta<sub>20</sub></b> | <b>Ta</b> | <b>Nb</b> | <b>Hf</b> | <b>Zr</b> | <b>Ti</b> |                   |                     |
|------------------------------------------------------------------------------------|-----------|-----------|-----------|-----------|-----------|-------------------|---------------------|
| <b>Pellet Impurities</b>                                                           |           |           |           |           |           |                   |                     |
| C / ppmw                                                                           | 5         | 26        | 20        | 100       | 10        |                   |                     |
| O / ppmw                                                                           | 23        | 86        | 230       | 1400      | 240       |                   |                     |
| N / ppmw                                                                           | 12        | 42        | 30        | 46        | 11        |                   |                     |
| <b>Wire Impurities</b>                                                             |           |           |           |           |           |                   |                     |
| C / ppmw                                                                           |           |           | 83        | 100       | 13        |                   |                     |
| O / ppmw                                                                           |           |           | 320       | 1200      | 214       |                   |                     |
| N / ppmw                                                                           |           |           | 72        | 30        | 10        |                   |                     |
|                                                                                    |           |           |           |           |           |                   |                     |
| <b>Weighed in Pellet Mass / g</b>                                                  | 7.142     | 3.806     | 7.278     | 3.604     | 1.930     |                   |                     |
| <b>Weighed in Wire Mass / g</b>                                                    | 0.260     |           | 0.033     | 0.132     | 0.031     |                   |                     |
|                                                                                    |           |           |           |           |           | <b>Total / ug</b> | <b>Total / ppmw</b> |
| <b>Weighed in C / ug</b>                                                           | 36        | 99        | 148       | 374       | 20        | 676               | 28                  |
| <b>Weighed in O / ug</b>                                                           | 164       | 327       | 1685      | 5204      | 470       | 7850              | 324                 |
| <b>Weighed in N / ug</b>                                                           | 86        | 160       | 221       | 170       | 22        | 658               | 27                  |

c)

| <b>Zr<sub>55</sub>Cu<sub>30</sub>Ni<sub>5</sub>Al<sub>10</sub></b> | <b>Zr</b> | <b>Cu</b> | <b>Al</b> | <b>Ni</b> |                   |                     |
|--------------------------------------------------------------------|-----------|-----------|-----------|-----------|-------------------|---------------------|
| <b>Pellet Impurities</b>                                           |           |           |           |           |                   |                     |
| C / ppmw                                                           | 100       |           |           | 10        |                   |                     |
| O / ppmw                                                           | 1400      | 2         |           | 20        |                   |                     |
| N / ppmw                                                           | 46        |           |           | 1         |                   |                     |
| <b>Wire Impurities</b>                                             |           |           |           |           |                   |                     |
| C / ppmw                                                           | 100       |           |           |           |                   |                     |
| O / ppmw                                                           | 1200      |           |           |           |                   |                     |
| N / ppmw                                                           | 30        |           |           |           |                   |                     |
|                                                                    |           |           |           |           |                   |                     |
| <b>Weighed in Pellet Mass / g</b>                                  | 15.160    | 5.631     | 0.800     | 0.887     |                   |                     |
| <b>Weighed in Wire Mass / g</b>                                    | 0.006     | 0.133     | 0.060     |           |                   |                     |
|                                                                    |           |           |           |           | <b>Total / ug</b> | <b>Total / ppmw</b> |
| <b>Weighed in C / ug</b>                                           | 1517      | 0         | 0         | 8         | 1525              | 67                  |
| <b>Weighed in O / ug</b>                                           | 21231     | 11        | 0         | 18        | 21260             | 938                 |
| <b>Weighed in N / ug</b>                                           | 698       | 0         | 0         | 1         | 699               | 31                  |

**Table S2.2:** Lower bound impurity estimation based on certified feedstock values, modified by revised Ti feedstock impurity concentrations as measured.

a)

| Ti-6Al-4V                         | Ti     | Al    | V     |                   |                     |
|-----------------------------------|--------|-------|-------|-------------------|---------------------|
| <b>Pellet Impurities</b>          |        |       |       |                   |                     |
| C / ppmw                          | 70     |       | 35    |                   |                     |
| O / ppmw                          | 750    |       | 150   |                   |                     |
| N / ppmw                          | 50     |       | 47    |                   |                     |
| <b>Wire Impurities</b>            |        |       |       |                   |                     |
| C / ppmw                          | 13     |       |       |                   |                     |
| O / ppmw                          | 214    |       |       |                   |                     |
| N / ppmw                          | 10     |       |       |                   |                     |
|                                   |        |       |       |                   |                     |
| <b>Weighed in Pellet Mass / g</b> | 10.089 | 0.739 | 0.437 |                   |                     |
| <b>Weighed in Wire Mass / g</b>   | 0.074  | 0.000 | 0.021 |                   |                     |
|                                   |        |       |       | <b>Total / ug</b> | <b>Total / ppmw</b> |
| <b>Weighed in C / ug</b>          | 707    | 0     | 15    | 722               | 64                  |
| <b>Weighed in O / ug</b>          | 7583   | 0     | 66    | 7648              | 673                 |
| <b>Weighed in N / ug</b>          | 505    | 0     | 21    | 526               | 46                  |

b)

| Ti <sub>20</sub> Zr <sub>20</sub> Hf <sub>20</sub> Nb <sub>20</sub> Ta <sub>20</sub> | Ta    | Nb    | Hf    | Zr    | Ti    |                   |                     |
|--------------------------------------------------------------------------------------|-------|-------|-------|-------|-------|-------------------|---------------------|
| <b>Pellet Impurities</b>                                                             |       |       |       |       |       |                   |                     |
| C / ppmw                                                                             | 5     | 26    | 20    | 100   | 70    |                   |                     |
| O / ppmw                                                                             | 23    | 86    | 230   | 1400  | 750   |                   |                     |
| N / ppmw                                                                             | 12    | 42    | 30    | 46    | 50    |                   |                     |
| <b>Wire Impurities</b>                                                               |       |       |       |       |       |                   |                     |
| C / ppmw                                                                             |       |       | 83    | 100   | 13    |                   |                     |
| O / ppmw                                                                             |       |       | 320   | 1200  | 214   |                   |                     |
| N / ppmw                                                                             |       |       | 72    | 30    | 10    |                   |                     |
|                                                                                      |       |       |       |       |       |                   |                     |
| <b>Weighed in Pellet Mass / g</b>                                                    | 7.142 | 3.806 | 7.278 | 3.604 | 1.930 |                   |                     |
| <b>Weighed in Wire Mass / g</b>                                                      | 0.260 |       | 0.033 | 0.132 | 0.031 |                   |                     |
|                                                                                      |       |       |       |       |       | <b>Total / ug</b> | <b>Total / ppmw</b> |
| <b>Weighed in C / ug</b>                                                             | 36    | 99    | 148   | 374   | 136   | 792               | 33                  |
| <b>Weighed in O / ug</b>                                                             | 164   | 327   | 1685  | 5204  | 1454  | 8834              | 365                 |
| <b>Weighed in N / ug</b>                                                             | 86    | 160   | 221   | 170   | 97    | 733               | 30                  |

**Table S3:** Vendor and purities information for the feedstock used for the synthesis of the demo alloys presented in Fig.8.

| Element   | <u>Pellets</u>  |                | <u>Wire</u>     |                |
|-----------|-----------------|----------------|-----------------|----------------|
|           | Purity          | Vendor         | Purity          | Vendor         |
| <b>Al</b> | 99.99%          | Kurt J. Lesker | 99.999%         | Kurt J. Lesker |
| <b>Cu</b> | 99.99%          | Kurt J. Lesker | 99.999%         | ESPI Metals    |
| <b>Hf</b> | 99.9% excl. Zr  | Kurt J. Lesker | 97%             | Goodfellow     |
| <b>Nb</b> | 99.95% excl. Ta | Kurt J. Lesker | 99.95% excl. Ta | Kurt J. Lesker |
| <b>Ni</b> | 99.995%         | Kurt J. Lesker | 99.98%          | Kurt J. Lesker |
| <b>Ta</b> | 99.95%          | Kurt J. Lesker | 99.9%           | Goodfellow     |
| <b>Ti</b> | 99.995%         | Kurt J. Lesker | 99.98%          | Kurt J. Lesker |
| <b>V</b>  | 99.7%           | Kurt J. Lesker | 99.8%           | Goodfellow     |
| <b>Zr</b> | Grade 702       | Kurt J. Lesker | 99.2%           | Goodfellow     |
